# Supplementary material for: Characterization of the promoter region of the bovine SIX1 gene: Roles of MyoD, PAX7, CREB and MyoG
Source: PubMed Central journal article supplement (PMC5626756; doi:10.1038/s41598-017-12787-5), 2017-10-03
Supplement: 41598_2017_12787_MOESM1_ESM.pdf [file 41598_2017_12787_MOESM1_ESM.pdf]

## **Characterization of the promoter region of the bovine *SIX1* gene: Roles of MyoD, PAX7, CREB and MyoG**

**Da-wei Wei<sup>1</sup>, Xue-yao Ma<sup>1</sup>, Song-Zhang<sup>1</sup>, Jie-yun Hong<sup>1</sup>, Lin-sheng Gui<sup>1,3</sup>, Chu-gang Mei<sup>1,3</sup>, Hong-fang Guo<sup>1</sup>, Li-Wang<sup>1</sup>, Yue-Ning<sup>1</sup> & Lin-sen Zan<sup>1,2,4\*</sup>**

<sup>1</sup>College of Animal Science and Technology, Northwest A&F University, Yangling 712100 Shaanxi, People's Republic of China. <sup>2</sup>National Beef Cattle Improvement Center, Northwest A&F University, Yangling 712100 Shaanxi, People's Republic of China. <sup>3</sup>Modern Cattle Biotechnology and Application of National-Local Engineering Research Center, Yangling 712100 Shaanxi, People's Republic of China. <sup>4</sup>Shaanxi Beef Cattle Engineering Research Center, Yangling 712100 Shaanxi, People's Republic of China.

Correspondence and requests for materials should be addressed to L.-S.Z. (email: zanlinsen@163.com). Tel.: +86-29-8709-1923; Fax: +86-29-8709-2164.

**SUPPLEMENTARY INFORMATION includes:**

**Supplementary Figures S1**

**Supplementary Flies of the Ethic Committee**

**b1.**

**Six1  
32KD**

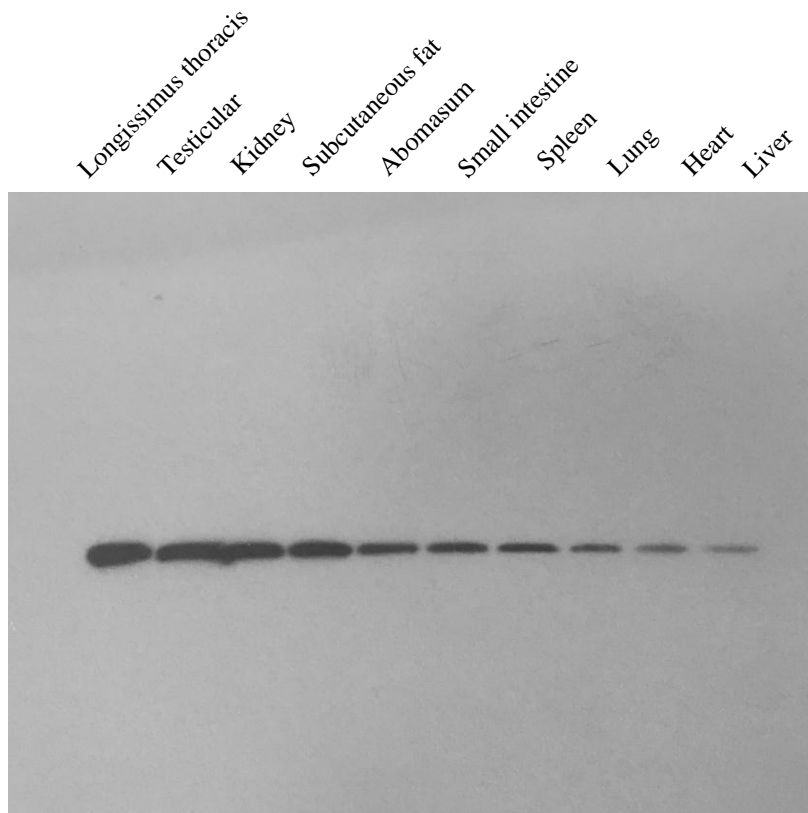

**b2.**

**$\beta$ -actin  
42KD**

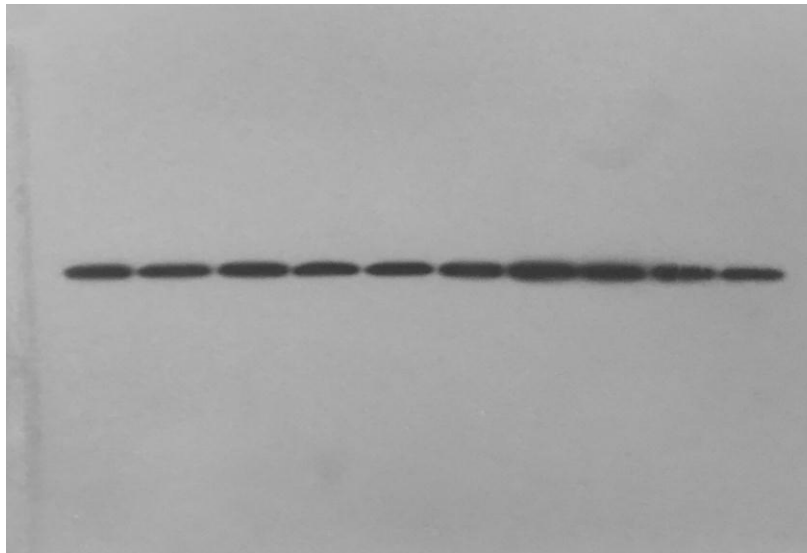

**Supplementary Figure S1: Western blots showing the different of bovine Six1 expression in tissues and organs and control.**
